# Supplementary material for: A novel fluorescent probe for Hg2+ detection in a wide pH range and its application in living cell imaging
Source: Royal Society of Chemistry journal article supplement (doi:10.1039/c8ay01887a), 2018-01-01
Supplement: c8ay01887a1.pdf [file c8ay01887a1.pdf]

## Electronic Supplementary Information

### **A novel fluorescent probe for Hg<sup>2+</sup> detection in a wide pH range and its application in living cell imaging**

Jing Xu<sup>‡</sup>, Honglin Li<sup>‡</sup>, Yanchi Chen, Bing Yang, Qingcai Jiao\*, Yushun Yang\*, Hailiang Zhu\*

*State Key Laboratory of Pharmaceutical Biotechnology, Nanjing University, Nanjing, 210023, China.*

*<sup>‡</sup>Both authors contributed equally to the work.*

*\* Corresponding authors. E-mail addresses: zhuhl@nju.edu.cn; ys\_yang@nju.edu.cn; jiaoqc@nju.edu.cn.*

### **Contents**

|                                                                                                        |           |
|--------------------------------------------------------------------------------------------------------|-----------|
| <b>Supplementary figures and tables</b> .....                                                          | <b>S2</b> |
| 1 UV absorption response of probe <b>XL-1</b> to Hg <sup>2+</sup> .....                                | S2        |
| 2 The UV-Vis titration of Hg <sup>2+</sup> towards <b>XL-1</b> .....                                   | S2        |
| 3 The effect of pH on <b>XL-1</b> and the reaction of <b>XL-1</b> with Hg <sup>2+</sup> .....          | S3        |
| 4 The response time of probe <b>XL-1</b> to Hg <sup>2+</sup> .....                                     | S3        |
| 5 Fluorescence intensity of <b>XL-1</b> to various metal ions .....                                    | S4        |
| 6 Fluorescence intensity of <b>XL-1</b> to various amino acids .....                                   | S4        |
| 7 Fluorescence intensity of <b>XL-1</b> to various anions .....                                        | S5        |
| 8 The effect of water volume fraction on <b>XL-1</b> sensing Hg <sup>2+</sup> .....                    | S5        |
| 9 Cytotoxicity of <b>XL-1</b> towards A549, HeLa, LO <sub>2</sub> and CT26 cells .....                 | S6        |
| 10 NMR spectra of <b>XL-1</b> .....                                                                    | S7        |
| 11 HRMS spectrum of <b>XL-1</b> and <b>Product A</b> .....                                             | S8        |
| 12 Comparison between <b>XL-1</b> and recent small molecule fluorescent Hg <sup>2+</sup> sensors ..... | S8        |

## Supplementary figures and tables:

### 1 UV absorption response of probe XL-1 to $\text{Hg}^{2+}$

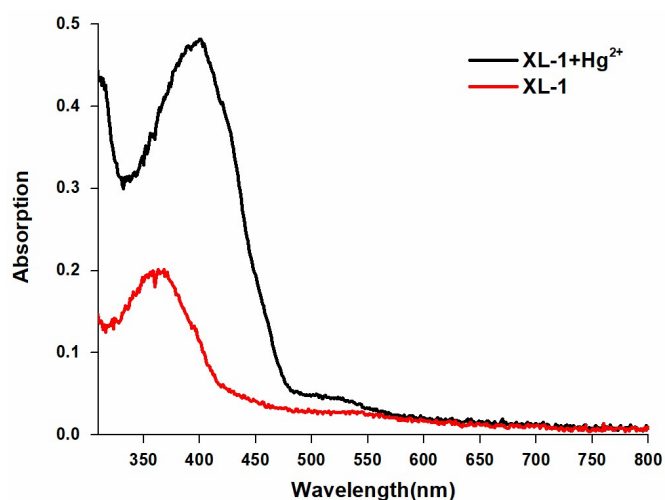

**Figure S1.** The absorption spectrum of XL-1 (50  $\mu\text{M}$ ) and the detecting system (XL-1: 50  $\mu\text{M}$  and  $\text{Hg}^{2+}$ : 100  $\mu\text{M}$ ) in PBS buffer (pH 7.4, 10 mM, 10% DMSO, v/v) at 25  $^{\circ}\text{C}$ .

### 2 The UV-Vis titration of $\text{Hg}^{2+}$ toward XL-1.

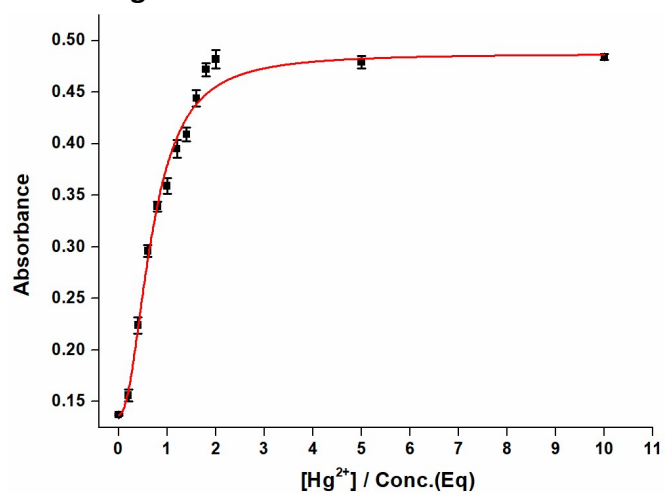

**Figure S2.** The UV-Vis titration of  $\text{Hg}^{2+}$  towards XL-1 (50  $\mu\text{M}$ ). The Y-axis represents the absorbance at 400 nm corresponding to the absorbance wavelength of the reaction mixture. It agreed with the typical 1:2 binding mechanism.

### 3 The effect of pH on XL-1 and the reaction of XL-1 with Hg<sup>2+</sup>

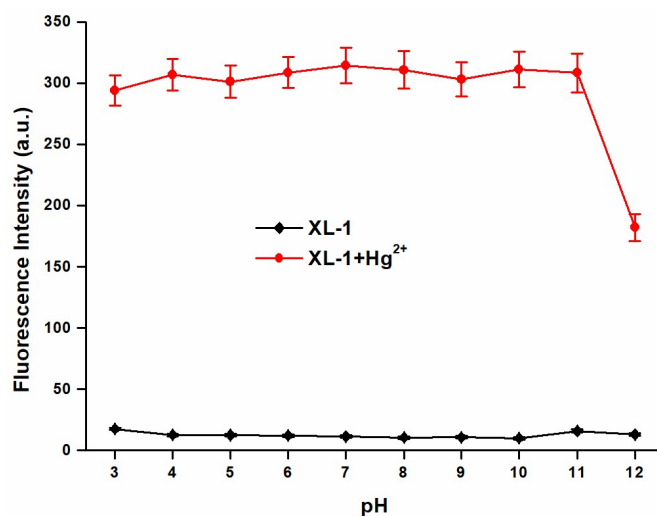

**Figure S3.** Fluorescence intensity changes of XL-1 (10  $\mu$ M) incubated with or without Hg<sup>2+</sup> (20  $\mu$ M) in PBS buffer (10 mM, 10% DMSO, v/v) with different pH values (from 3.0 to 12.0) at 25  $^{\circ}$ C for 1 h (Red: XL-1 + Hg<sup>2+</sup>; Black: XL-1).

### 4 The response time of probe XL-1 to Hg<sup>2+</sup>

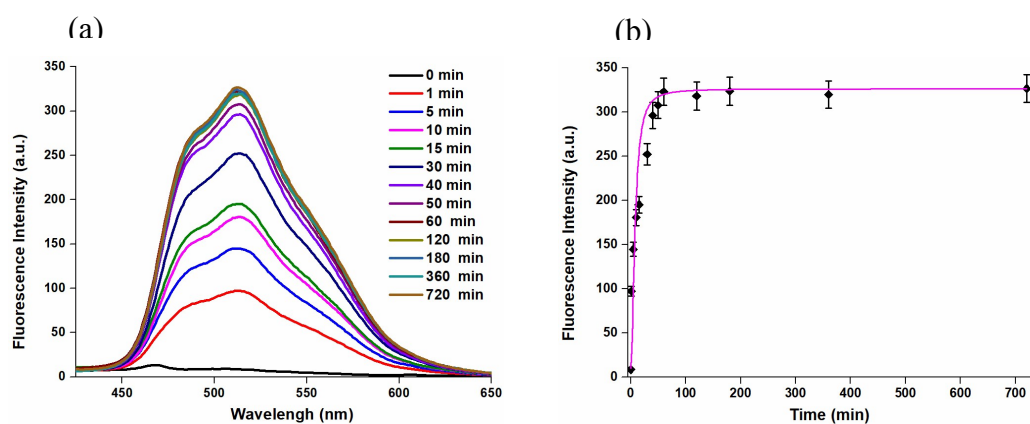

**Figure S4.** (a) Fluorescence spectra changes of the detecting system in PBS buffer (pH 7.4, 10 mM, 10% DMSO, v/v) at 25  $^{\circ}$ C with time (0-12 h). (b) Relationship between fluorescence intensity and different time points (0, 1, 5, 10, 15, 30, 40, 50, 60, 120, 180, 360, 720 min). The Fluorescence intensity reach the maximum at 60 min. The data represent the mean  $\pm$  SD of at least three independent experiments.  $\lambda_{\text{ex}}$  = 401 nm, Slit widths 5 nm, Photomultiplier voltage 650 V.

## 5 Fluorescence intensity of XL-1 to various metal ions

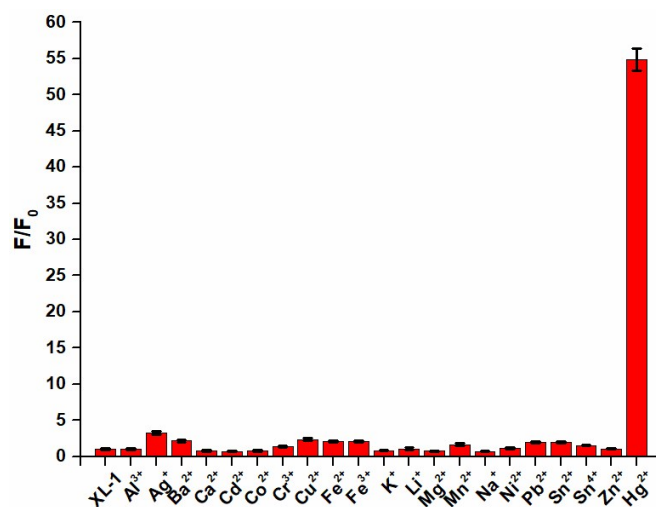

**Figure S5.** Fluorescence intensity of **XL-1** (10  $\mu$ M) in PBS buffer (pH 7.4, 10 mM, 10% DMSO, v/v) at 25  $^{\circ}$ C to various metal ions (20  $\mu$ M). The data represent the mean  $\pm$  SD of at least three independent experiments.  $\lambda_{\text{ex}}$  = 401 nm, Slit widths 5 nm, Photomultiplier voltage 650 V. Incubation time: 1 h.

## 6 Fluorescence intensity of XL-1 to various amino acids

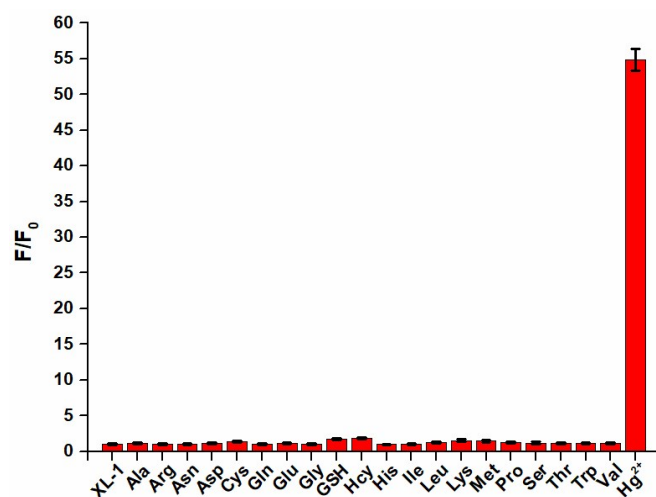

**Figure S6.** Fluorescence intensity of **XL-1** (10  $\mu$ M) in PBS buffer (pH 7.4, 10 mM, 10% DMSO, v/v) at 25  $^{\circ}$ C to various amino acids (200  $\mu$ M) (including Hcy and GSH). The data represent the mean  $\pm$  SD of at least three independent experiments.  $\lambda_{\text{ex}}$  = 401 nm, Slit widths 5 nm, Photomultiplier voltage 650 V. Incubation time: 1 h.

## 7 Fluorescence intensity of XL-1 to various anions

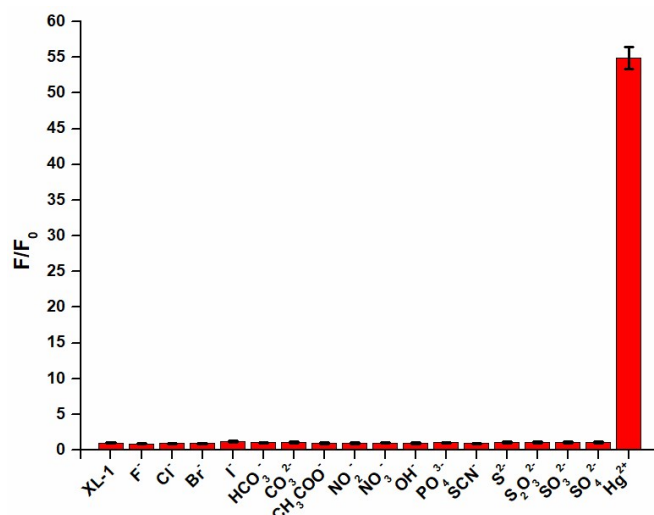

**Figure S7.** Fluorescence intensity of **XL-1** (10  $\mu$ M) in PBS buffer (pH 7.4, 10 mM, 10% DMSO, v/v) at 25  $^{\circ}$ C to various anions (200  $\mu$ M). The data represent the mean  $\pm$  SD of at least three independent experiments.  $\lambda_{\text{ex}}$  = 401 nm, Slit widths 5 nm, Photomultiplier voltage 650 V. Incubation time: 1 h.

## 8 The effect of water volume fraction on XL-1 sensing Hg<sup>2+</sup>

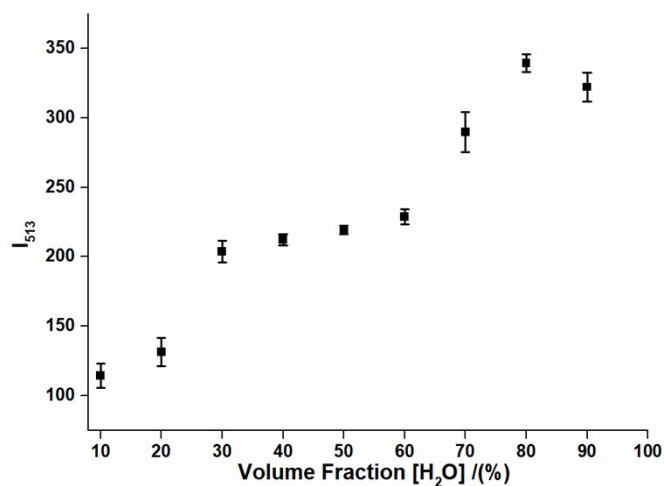

**Figure S8.** The effect of water volume fraction (10% - 90%) on the probe **XL-1** sensing Hg<sup>2+</sup>. The fluorescence intensity at 513 nm was recorded.

## 9 Cytotoxicity of XL-1 towards A549, HeLa, LO<sub>2</sub> and CT26 cells

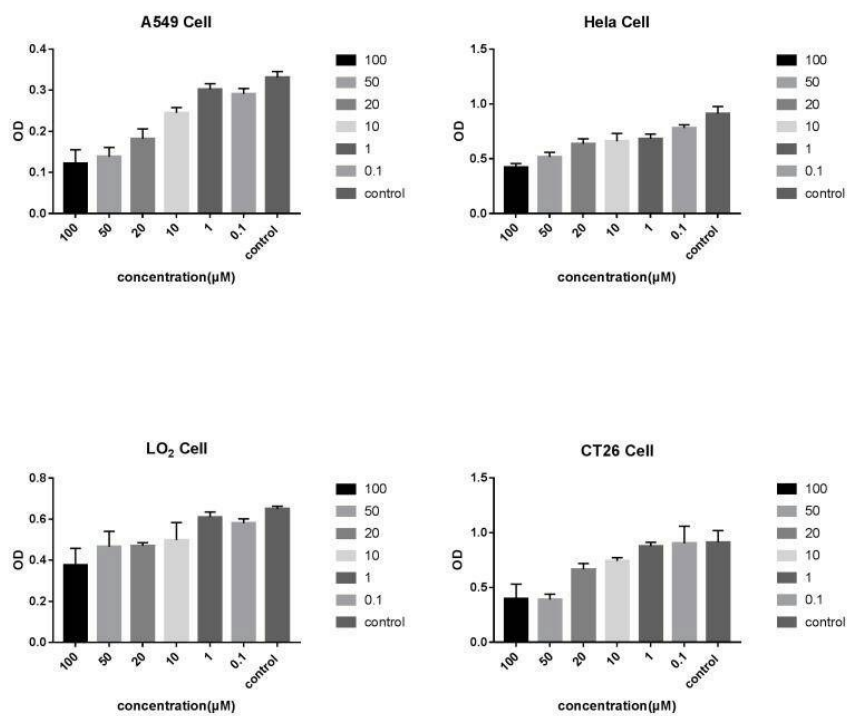

**Figure S9.** Cell viability of A549 (human alveolar epithelial cell line), HeLa (human cervical cancer cell line), LO<sub>2</sub> (human embryonic liver cell line) and CT26 (mouse colon cancer cells) with different concentrations of **XL-1**.

## 10 NMR spectra of XL-1

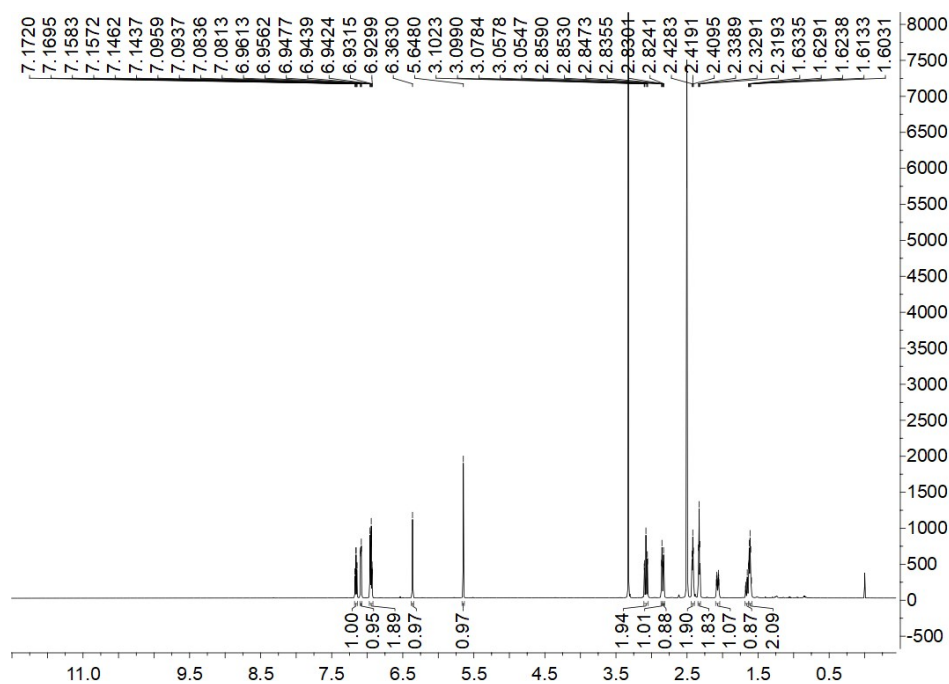

Figure S10. <sup>1</sup>H NMR of compound XL-1 (600 MHz, in DMSO-*d*<sub>6</sub>).

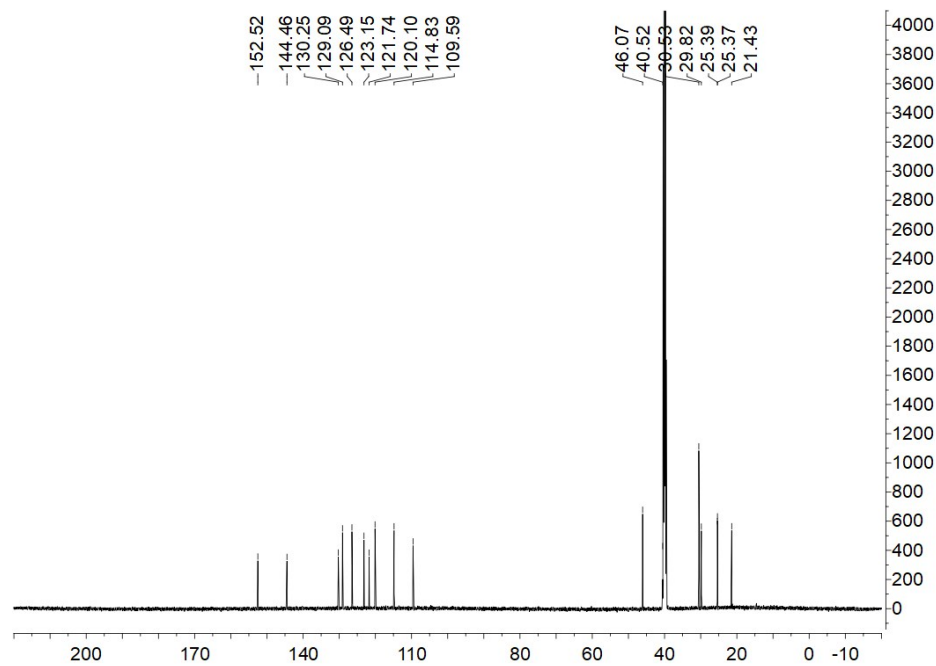

Figure S11. <sup>13</sup>C NMR of compound XL-1 (150 MHz, in DMSO-*d*<sub>6</sub>).

## 11 HRMS spectrum of XL-1 and Product A

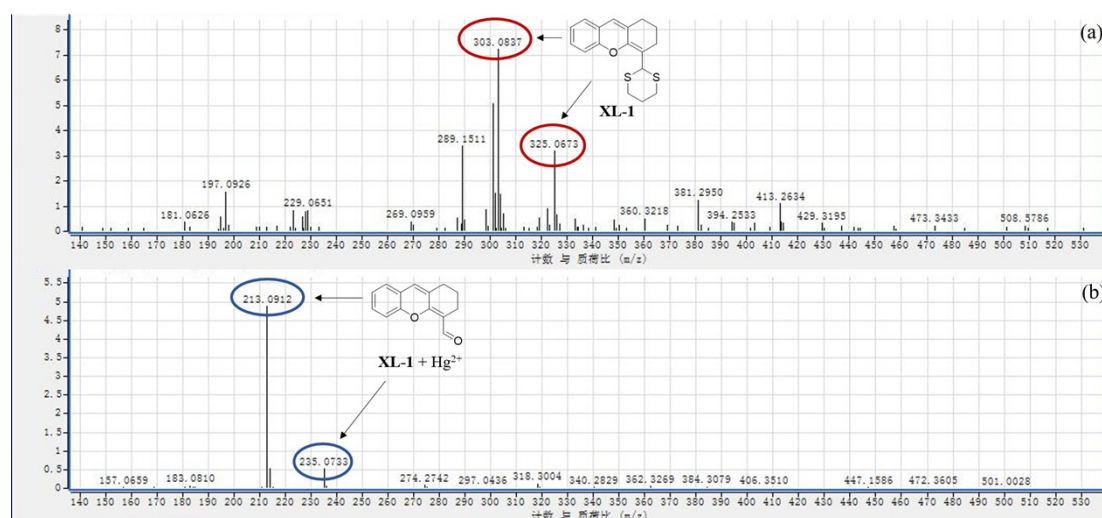

**Figure S12.** (a) HRMS spectrum of **XL-1**. (b) HRMS spectrum of **Product A**.

## 12 Comparison between XL-1 and recent small molecule fluorescent Hg<sup>2+</sup> sensors

**Table S1.** Comparison between **XL-1** and recent small molecule fluorescent Hg<sup>2+</sup> sensors.

| Sensors     | Fluorophore   | Range of pH | Sensing mode | EDTA Competition | Steadiness | Toxicity | Application       | Selectivity             |
|-------------|---------------|-------------|--------------|------------------|------------|----------|-------------------|-------------------------|
| <b>XL-1</b> | Xanthene      | 3.0-11.0    | Turn on      | Done             | >12h       | Low      | Cell imaging      | High                    |
| Ref 18      | Coumarin      | 4.0-7.0     | Turn on      | NG               | NG         | NG       | Real water sample | High                    |
| Ref 19      | Coumarin      | 6.5-9.0     | Turn on      | NG               | NG         | Low      | Cell imaging      | High                    |
| Ref 24      | Rhodamin      | 4.0-10.0    | Ratio        | NG               | NG         | Low      | Cell imaging      | Not good                |
| Ref 25      | Rhodamin      | 3.5-4.5     | Turn on      | NG               | NG         | NG       | NG                | Except Cu <sup>2+</sup> |
| Ref 29      | Benzothiazole | 3.0-5.0     | Turn on      | NG               | NG         | NG       | Waste water       | High                    |
| Ref 34      | Pyrene        | 3.0-7.4     | Turn on      | NG               | NG         | NG       | Cell imaging      | Not good                |
| Ref 37      | Naphthalene   | 7.5-10.0    | Turn off     | NG               | NG         | NG       | Real water sample | Not good                |
| Ref 38      | Anthracene    | 7.0-9.0     | Turn on      | NG               | NG         | Low      | Cell imaging      | High                    |
| Ref 39      | BODIPY        | 5.0-8.0     | Turn on      | NG               | NG         | Low      | In vivo imaging   | Except Al <sup>3+</sup> |
| Ref 40      | BODIPY        | 7.0-12.0    | Turn off     | Done             | NG         | Low      | Cell imaging      | Not good                |

NG means Not Given; For each property the top class sensors were labeled in blue.
